# Supplementary material
Source: PubMed Central journal article supplement (PMC4527019)
Supplement: CJN.04360514_CJN04360514SupplementaryData.pdf [file CJN.04360514_CJN04360514SupplementaryData.pdf]

Online Table 1. Baseline characteristics of enrolled and non-enrolled acute kidney injury patients at intensive care unit admission

|                             | Screened not enrolled AKI |                     | Enrolled AKI         |                     | p*                      |
|-----------------------------|---------------------------|---------------------|----------------------|---------------------|-------------------------|
|                             | n=530                     |                     | n=745                |                     |                         |
|                             | Developed<br>n = 332      | Emerging<br>n = 198 | Developed<br>n = 316 | Emerging<br>n = 429 |                         |
| <b>Age (years)</b>          | 59.9 ± 16.9               |                     | 60.5 ± 18.4          |                     | 0.50                    |
|                             | 61.1 ± 16.7               | 58.3 ± 16.9         | 62.2 ± 16.9          | 59.2 ± 19.4         | Not enrolled<br>0.07    |
|                             |                           |                     |                      |                     | Enrolled 0.004          |
| <b>Gender<br/>(male, %)</b> | 64.2                      |                     | 62.2                 |                     | 0.51                    |
|                             | 61.7                      | 68.5                | 61.7                 | 62.7                | Not enrolled<br>0.11    |
|                             |                           |                     |                      |                     | Enrolled 0.92           |
| <b>Caucasian (%)</b>        | 32.7                      |                     | 43.0                 |                     | <0.001*                 |
|                             | 49.7                      | 4.6                 | 61.0                 | 28.7                | Not enrolled<br><0.001* |
|                             |                           |                     |                      |                     | Enrolled<br><0.001*     |

|                                         |             |             |             |             |               |
|-----------------------------------------|-------------|-------------|-------------|-------------|---------------|
| <b>Body weight (kg)</b>                 | 79.0 ± 24.9 |             | 75.7 ± 21.6 |             | 0.12          |
|                                         | 85.0 ± 28.6 | 69.2 ± 11.9 | 84.1 ± 26.9 | 69.6 ± 13.6 | Not enrolled  |
|                                         |             |             |             |             | <0.001*       |
|                                         |             |             |             |             | Enrolled      |
|                                         |             |             |             |             | <0.001*       |
| <b>Chronic kidney disease (%)</b>       | 48.0        |             | 47.5        |             | 0.78          |
|                                         | 38.0        | 64.5        | 38.3        | 54.3        | Not enrolled  |
|                                         |             |             |             |             | <0.001*       |
|                                         |             |             |             |             | Enrolled      |
|                                         |             |             |             |             | <0.001*       |
| <b>eGFR (ml/min/1.73 m<sup>2</sup>)</b> | 66.9 ± 38.2 |             | 64.8 ± 41.0 |             | 0.89          |
|                                         | 75.6 ± 38.3 | 52.4 ± 33.3 | 73.6 ± 38.1 | 58.2 ± 41.9 | Not enrolled  |
|                                         |             |             |             |             | 0.001*        |
|                                         |             |             |             |             | Enrolled      |
|                                         |             |             |             |             | 0.001*        |
| <b>Reference creatinine (mg/dl)</b>     | 1.64 ± 1.03 |             | 1.76 ± 1.59 |             | 0.16          |
|                                         | 1.46 ± 0.89 | 1.98 ± 1.16 | 1.62 ± 1.31 | 1.91 ± 1.77 | Not enrolled  |
|                                         |             |             |             |             | <0.001*       |
|                                         |             |             |             |             | Enrolled 0.01 |
| <b>Diabetes</b>                         | 19.7        |             | 35.3        |             | 0.001*        |

|                       |      |      |      |      |                                                |
|-----------------------|------|------|------|------|------------------------------------------------|
|                       | 23.6 | 13.2 | 33.5 | 36.6 | Not enrolled<br>0.004<br>Enrolled 0.67         |
| <b>Heart failure</b>  | 15.3 |      | 25.6 |      | 0.004                                          |
|                       | 17.2 | 12.2 | 23.3 | 27.5 | Not enrolled<br>0.12<br>Enrolled 0.20          |
| <b>Cirrhosis</b>      | 10.1 |      | 8.8  |      | 0.82                                           |
|                       | 13.8 | 4.1  | 11.8 | 6.4  | Not enrolled<br><0.001*<br>Enrolled 0.01       |
| <b>Main diagnosis</b> |      |      |      |      | <0.001*                                        |
| <b>(%)</b>            |      |      |      |      | Not enrolled<br><0.001*<br>Enrolled<br><0.001* |
| <b>Septic shock</b>   | 15.7 |      | 8.9  |      |                                                |
|                       | 8.9  | 26.9 | 8.9  | 8.9  |                                                |

|               |      |      |      |      |
|---------------|------|------|------|------|
| Cardiological | 24.3 |      | 20.4 |      |
|               | 21.8 | 28.3 | 18.7 | 21.7 |
| Respiratory   | 13.2 |      | 10.6 |      |
|               | 19.6 | 2.5  | 16.2 | 6.5  |
| Nephrological | 5.7  |      | 13.0 |      |
|               | 2.1  | 11.7 | 2.5  | 20.7 |

\*: please note that a significant p value is <0.002 with the Bonferroni correction

AKI: acute kidney injury

eGFR: estimated glomerular filtration rate

Online Table 2. Risk factors for non-renal recovery in survivors from developed and emerging countries at hospital discharge (n = 581)

| <b>Renal recovery criteria</b> | Creatinine at hospital discharge within 50% of<br>reference creatinine |              |
|--------------------------------|------------------------------------------------------------------------|--------------|
|                                | <b>OR</b>                                                              | <b>95%CI</b> |
| <b>Emerging country</b>        | 2.06                                                                   | 1.26-3.36    |
| <b>APACHE III score</b>        | 1.01                                                                   | 1.00-1.02*   |
| <b>AKI stage 3 with RRT</b>    | 3.28                                                                   | 1.98-5.44    |

RRT: renal replacement therapy

Area under the ROC curve (c statistic): 0.734 (0.682-0.787)

Hosmer-Lemeshow: H-L: 0.120

\*p=0.15
